# Supplementary material
Source: PubMed Central journal article supplement (PMC5809290)

## Supplementary Figure Legends

**Supplementary Fig. 1 | Immune Cell Profiling by Multi-Color Flow Cytometry.** **a**, common gating for viable CD45+ cells. **b**, Gating hierarchy for T cell lineage and phenotypic marker. **c**, Myeloid cell gating hierarchy. **d**, Gating for NK lineage and Tregs.

**Supplementary Fig. 2 | Immune Cell Profiling of MDOTS.** **a-b**, Mean fluorescent intensity (MFI) of major leukocyte lineage markers (**a**) and lymphocyte and monocyte phenotypic markers (**b**) with and without exposure to collagenase (type IV) and DNase. **c**, comparison of gated populations +/- collagenase (type IV) and DNase I ( $R^2 = 0.991$ ), as previously described (44). **d**, Immune cell sub-populations from MC38 bulk tumor (n=5) to S1, S2, S3 (n=6) were evaluated by flow cytometry, as in Fig. 1b (Kruskal-Wallis test with Dunn's multiple comparisons test,  $\alpha=0.05$ ; \* $p<.05$ ; *ns*=not significant). **e**, Pearson correlation matrix using composite of 21 cell surface markers in MC38 tumor, S1, S2, and S3 spheroids (Table S1). **f**, CD45+ cells (%live cells) in MC38 (n=6), CT26 (n=5), and B16F10 (n=5) MDOTS (S2). Kruskal-Wallis test with Dunn's multiple comparisons test,  $\alpha=0.05$ ; \* $p<.05$ . **g**, immune sub-populations (%CD45+ cells) in MC38 (n=6), B16F10 (n=5), and CT26 (n=5) MDOTS (S2). 2-way ANOVA with Tukey's multiple comparisons test,  $\alpha=0.05$ ; \* $p<.05$ , \*\*\* $p<.001$ , \*\*\*\* $p<.0001$ ). **h**, Immunohistochemical staining for CD45+ and CD8+ cells and quantitation of CD8+ cells in FFPE sections from an explanted MC38 tumor (average of 10 high power fields, 200x magnification). **i**, Spheroid size evaluation of MC38 MDOTS (Day 6) stained with AO/PI.

**Supplementary Fig. 3 | *In vivo* and *ex vivo* profiling of PD-1 blockade.** **a**, Live/dead analysis of MC38 MDOTS  $\pm$  anti-PD-1 performed by independent lab (n=3, biological replicates). **b**, Live/dead analysis of Lewis lung carcinoma (LLC) MDOTS  $\pm$  anti-PD1 (n=2, biological replicates, *ns* = not significant). **c-d**, Live/dead analysis of MC38 MDOTS (c, Day 6) and GL261 MDOTS (d, Day 5)

following treatment with isotype IgG control (10  $\mu\text{g}/\text{mL}$ ) or anti-PD-1 (10  $\mu\text{g}/\text{mL}$ )  $\pm$  anti-CD8 (10  $\mu\text{g}/\text{mL}$ ) ( $n \geq 3$ , biological replicates; 2-way ANOVA with Tukey's multiple comparisons test;  $**p < .01$ ,  $***p < .001$ ,  $****p < .0001$ ,  $ns$  = not significant). **e**, MC38 MDOTS stained for CD45+ immune cells (purple) and CD8+ T cells (yellow) with calcein (green) staining live cells and Hoechst (blue) staining all cell nuclei at Day 7 after treatment with IgG (10  $\mu\text{g}/\text{mL}$ ) or anti-PD-1 (10  $\mu\text{g}/\text{mL}$ ) (scale bar = 20  $\mu\text{m}$ ). Colors are virtually adjusted for better representation. **f**, Comparison of intra-tumoral and inter-tumoral heterogeneity evaluating CD8+ T cell counts (IF, performed on Day 4) and live/dead analysis (AO/PI staining) of CT26 MDOTS (Day 5) ( $n = 3$ , biological replicates; 2-way ANOVA with Tukey's multiple comparisons test;  $****p < .0001$ ,  $ns$  = not significant).

**Supplementary Fig. 4 | Synthesis and evaluation of a novel TBK1/IKBKE inhibitor.** **a**, Absolute cytokine levels in CT26 MDOTS over time ( $n = 3$ , biological replicates). **b-c**, Live/Dead analysis at Day 6 (b) and heatmap of relative cytokine changes (c) in CT26 MDOTS treated with anti-CCL2  $\pm$  anti-PD-1 at Days 1, 3, and 6 (L2FC relative to isotype control;  $n = 3$ , biological replicates). **d**, Chemical synthesis of Compound 1. **e**,  $\text{IC}_{50}$  curves for TBK1 and  $\text{IKK}\epsilon$  (IKBKE). **f**, Effect of Compound 1 on viability of CT26 spheroids lacking immune cells ( $n = 3$ , biological replicates; 2-way ANOVA with Sidak's multiple comparisons test;  $ns$  = not significant). **g**, Percent-change in IL-2 levels produced by Jurkat cells with increasing doses of Compound 1. **h**, Re-implantation of CT26 and EMT-6 cells into the flanks of a mouse previously treated with anti-PD-L1+ Compound 1.

**Supplementary Fig. 5 | Immune Cell Profiling of PDOTS.** **a-b**, Surface expression of T cell exhaustion markers (PD-1, CTLA-4, TIM-3) on (a) CD4 and (b) CD8 populations in PDOTS ( $n = 40$ ). **c**, Surface expression of PD-L1 and PD-L2 on myeloid sub-populations, including granulocytic myeloid-derived suppressor cells (gMDSCs), monocytes, tumor-associated macrophages (TAMs), monocytic myeloid-derived suppressor cells (mMDSCs), and plasmacytoid dendritic cells (pDCs). **d**, Immune cell

sub-populations of PDOTS fractions (S1, S2, S3) evaluated by flow cytometry, for CD45+ (n=8), CD3+ (n=8), CD4+ (n=7), CD8+ (n=7), CD14+ (n=7), and CD15+ (n=6). Kruskal-Wallis test with Dunn's multiple comparisons test,  $\alpha=0.05$ ; *ns*=not significant. **e-f**, Antigen-experienced sub-population (CD45RO+), effector memory (CD45RO+CCR7-) subtype, and surface expression of T cell exhaustion markers (PD-1, CTLA-4, TIM-3) on CD4 (e) and CD8 (f) populations in PDOTS fractions (n $\geq$ 3; Kruskal-Wallis test with Dunn's multiple comparisons test,  $\alpha=0.05$ ; *ns*=not significant). **g-k**, Live/dead analysis (g) of PDOTS (early stage resected NSCLC tumor, Day 7) in response to  $\alpha$ PD-1 (250  $\mu$ g/mL pembrolizumab),  $\alpha$ PD-L1 (600  $\mu$ g/mL atezolizumab), or IFN $\gamma$  (200 ng/mL), and baseline immune profiling (h-k) of PDOTS from the same NSCLC tumor, demonstrating percent CD45+ cells (h), percent lymphoid and myeloid subsets (i), percent CD4 and CD8 T cells (j), and CD4/CD8 T cell subsets (k), demonstrating abundance of effector memory CD4 and CD8 T cells.

**Supplementary Fig. 6 | Cytokine Profiling of PDOTS.** **a-c**, Absolute cytokine levels (pg/mL) obtained by bead-based cytokine profiling of PDOTS under control conditions or in response to  $\alpha$ PD-1 grouped by (a) Th1 and IFN- $\gamma$  effector cytokines, (b) granulocyte chemoattractants, and (c) IPRES immune suppressive cytokines, (n=28; 2-sided, paired, *t*-test,  $\alpha=0.05$ ). **d**, Comparison of PDOTS cytokine profiles after 3 days in standard growth conditions with and without isotype control IgG antibody (50  $\mu$ g/mL) (n=2). Performed using PDOTS derived from sample MGH-16 (melanoma). **e**, CCL19 and CXCL13 levels (pg/mL) relative to the number of spheroids per device in control and treatment ( $\alpha$ PD-1) conditions ( $R^2$  = Pearson correlation coefficient). **f-g**, Biological replicates for MGH-16 PDOTS in response to PD-1 blockade (n=3, L2FC relative to untreated control on Day 3). **h**, Correlation between CCL19 and CXCL13 upregulation (log<sub>2</sub> fold-change relative to untreated control) in response to  $\alpha$ PD-1,  $\alpha$ CTLA-4, or  $\alpha$ PD-1 +  $\alpha$ CTLA-4 ( $R^2$  = Pearson correlation coefficient). **i**, Effect of culture in the microfluidic device on cytokine profile following  $\alpha$ PD-1 treatment. Equal volumes of PDOTS from patient MGH-16 (in collagen hydrogels) were loaded for microfluidic device (or into a single well of a 96-

well plate in equal volumes of culture media. Media was collected on Day 3 (control and  $\alpha$ PD-1) for cytokine profiling. Induction of cytokines represented as fold-change relative to the untreated control.

**Supplementary Fig. 7 | Single and Dual Immune Checkpoint Blockade in PDOTS. a-d**, Heatmaps demonstrating log(2) fold-change (relative to untreated control, ranked highest to lowest) in cytokine profiles using conditioned media obtained at indicated time points of *ex vivo* microfluidic culture with  $\alpha$ PD-1,  $\alpha$ CTLA-4, or  $\alpha$ PD-1 +  $\alpha$ CTLA-4. Arrows denote effector cytokines (e.g. IFN- $\gamma$ , IL-2) associated with immune-mediated cytotoxicity. **a**, DFCI-25 (melanoma PDOTS). **b**, MGH-12 (melanoma PDOTS). **c**, DFCI-16 (thyroid carcinoma PDOTS). **d**, DFCI-19 (pancreatic adenocarcinoma PDOTS).

**Supplementary Fig 8 | Cellular and Tissue Sources of CCL19 and CXCL13. a**, PDOTS were divided into CCL19/CXCL13-high (n=14) and CCL19/CXCL13-low (n=14) by median L2FC (Mann-Whitney test, \*\*\*\*p<.0001). **b**, Median immune cell composition (CD45+, CD4+, CD8+, CD14+, CD15+) between PDOTS with distinct *ex vivo* expression of CCL19/CXCL13 (high vs. low). **c**, Median immune cell composition (CD4+PD1+ and CD8+PD-1+) in CCL19/CXCL13 high vs. low PDOTS. **d**, Relative expression of CCL19 and CXCL13 by qRT-PCR in cancer-associated fibroblasts (CD45-CD90+), cancer-associated endothelial cells (CD31+CD144+), CD45- (cancer cells, etc.) and CD45+ immune cells following 4-way cell sorting (n=2, technical replicates from MGH-16). **e**, immunohistochemical staining of CCL19, CXCL13,  $\alpha$ SMA (cancer-associated fibroblasts), and CD31 (endothelial cells) in melanoma specimen (pt 422, on-treatment; 40x magnification, scale bar 400  $\mu$ m). **f**, CCL19 and CXCL13 levels in MC38 MDOTS treated with IgG isotype control (10  $\mu$ g/mL),  $\alpha$ PD-1 (10  $\mu$ g/mL),  $\alpha$ PD-1 +  $\alpha$ CD8 (10  $\mu$ g/mL, each), or IFN $\gamma$  (200 ng/mL) at Days 1, 3, 6 of *ex vivo* culture. **g**, CCL19 levels in lysates from a CT26 tumor and a tumor-draining lymph node (lymph node) obtained from a mouse with prolonged response to PD-1 blockade (treated biweekly with  $\alpha$ PD-1 for 3 weeks, starting at Day 8; tumor and tumor-draining lymph node collected on Day 70 following implantation).

**Supplementary Fig. 9 | Evaluation of CCL19, CXCL13, and Candidate Effector Molecules in Melanoma.** **a**, RNA-seq showing select cytokines, cytokine receptors, cytotoxic T cell (CTL) associated genes, and IPRES transcripts (L2FC relative to pre-treatment control) in indicated sets of patient samples (group A - immune infiltrated; group B – immune poor by ssGSEA, Fig. 7c). **b-c**, RNA-seq absolute expression (RPKM) for (b) cytotoxic T cell effector associated genes (IFNG, IFNGR1, granzyme A, granzyme B) and (c) select IPRES genes in melanoma biopsy specimens (pre- and on-treatment) from group A (n=10 samples from 4 patients) or group B (n=17 samples from 6 patients). **d**, Box and whisker plots of OS and PFS using RNA-seq patient samples (Mann-Whitney test; \*\*p<.01, ns = not significant). **e**, Kaplan-Meier survival curve by (f) CCL19/CXCL13 expression (high vs. low) using cutaneous melanoma (SKCM) TCGA data (38) (log-rank Mantel-Cox test; \*\*\*p<.001).

**Supplementary Fig 10 | Cytokine profiles and response to PD-1 blockade.** **a**, Patients (from PDOTS and RNA-seq studies) were stratified into response groups based on duration of overall survival (OS) and duration of progression-free survival (PFS). Clinical benefit (CB) was defined as OS >360 days and PFS >180 days (n=9). No clinical benefit (NCB) was defined as OS <360 days (n=6). An additional cohort of patients who achieved long-term survival (OS > 360 days) with early tumor progression (PFS <180 days; n=9). **b-c**, Box and whisker plots of PFS (b) and OS (c) using PDOTS and RNA-seq patient samples grouped by response (Kruskal-Wallis with Dunn's multiple comparisons test; \*p<.05, \*\*p<.01, \*\*\*p<.001). **d**, Composite IPRES (14) score (sum of L2FC for CCL2, CCL7, CCL8, CCL13, IL-10) in response to *ex vivo* PD-1 blockade in PDOTS samples grouped by response. **e**, Heatmaps of Day 3 PDOTS anti-PD1 induced cytokines for samples DFCI-13, -16, -18, and -21 (serial sampling from same patient with metastatic papillary thyroid cancer), expressed as L2FC relative to untreated control. **f**, Serial immune profiling of samples DFCI-13, -16, -18, -21, and -22 from the same patient undergoing indicated treatments.

Supplementary Fig. 1

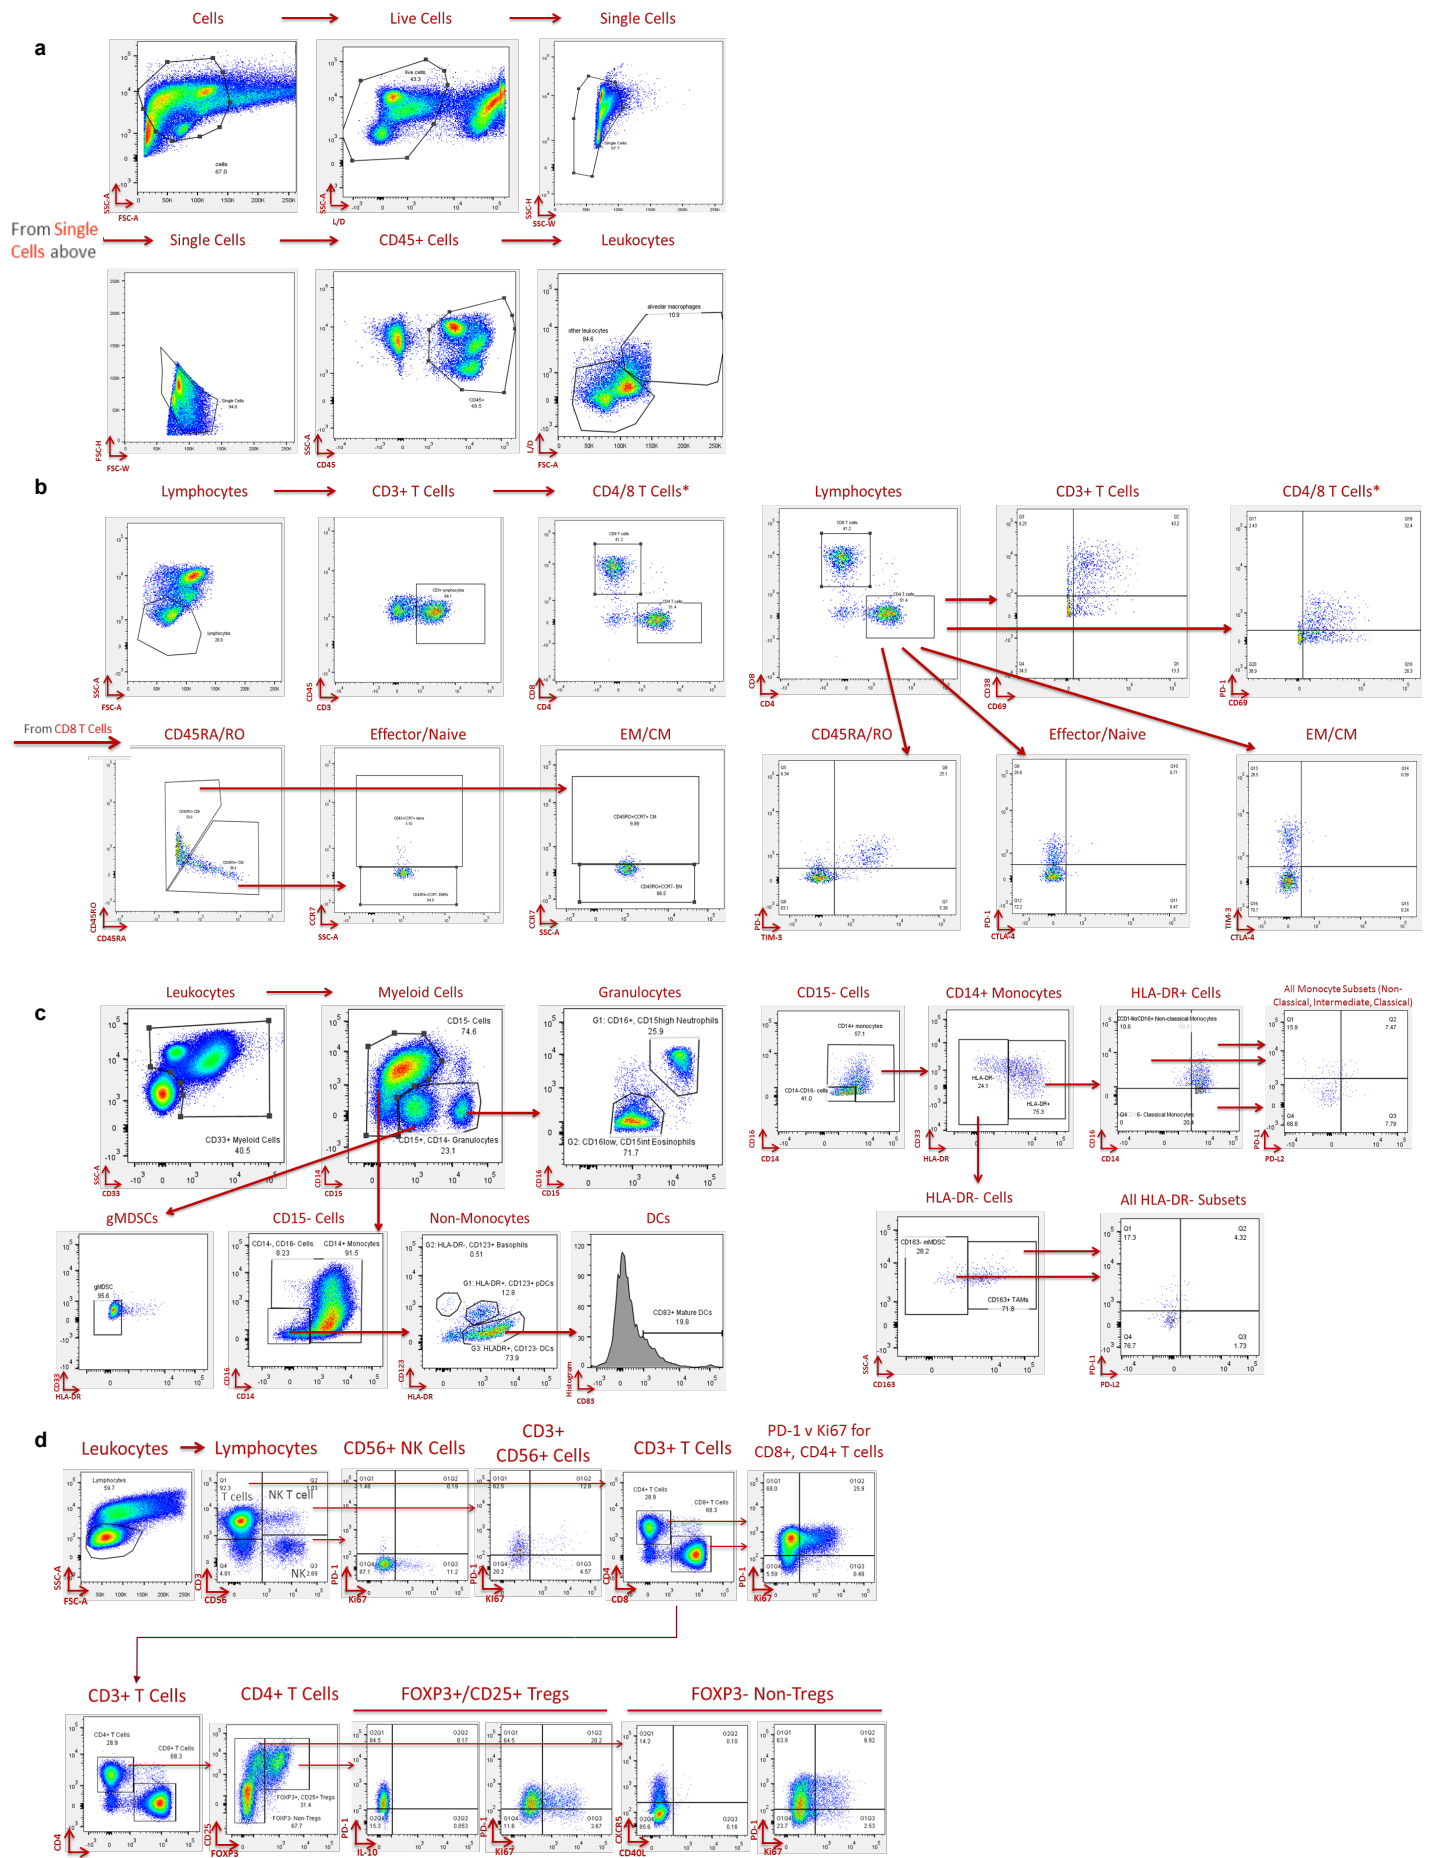

Supplementary Fig. 2

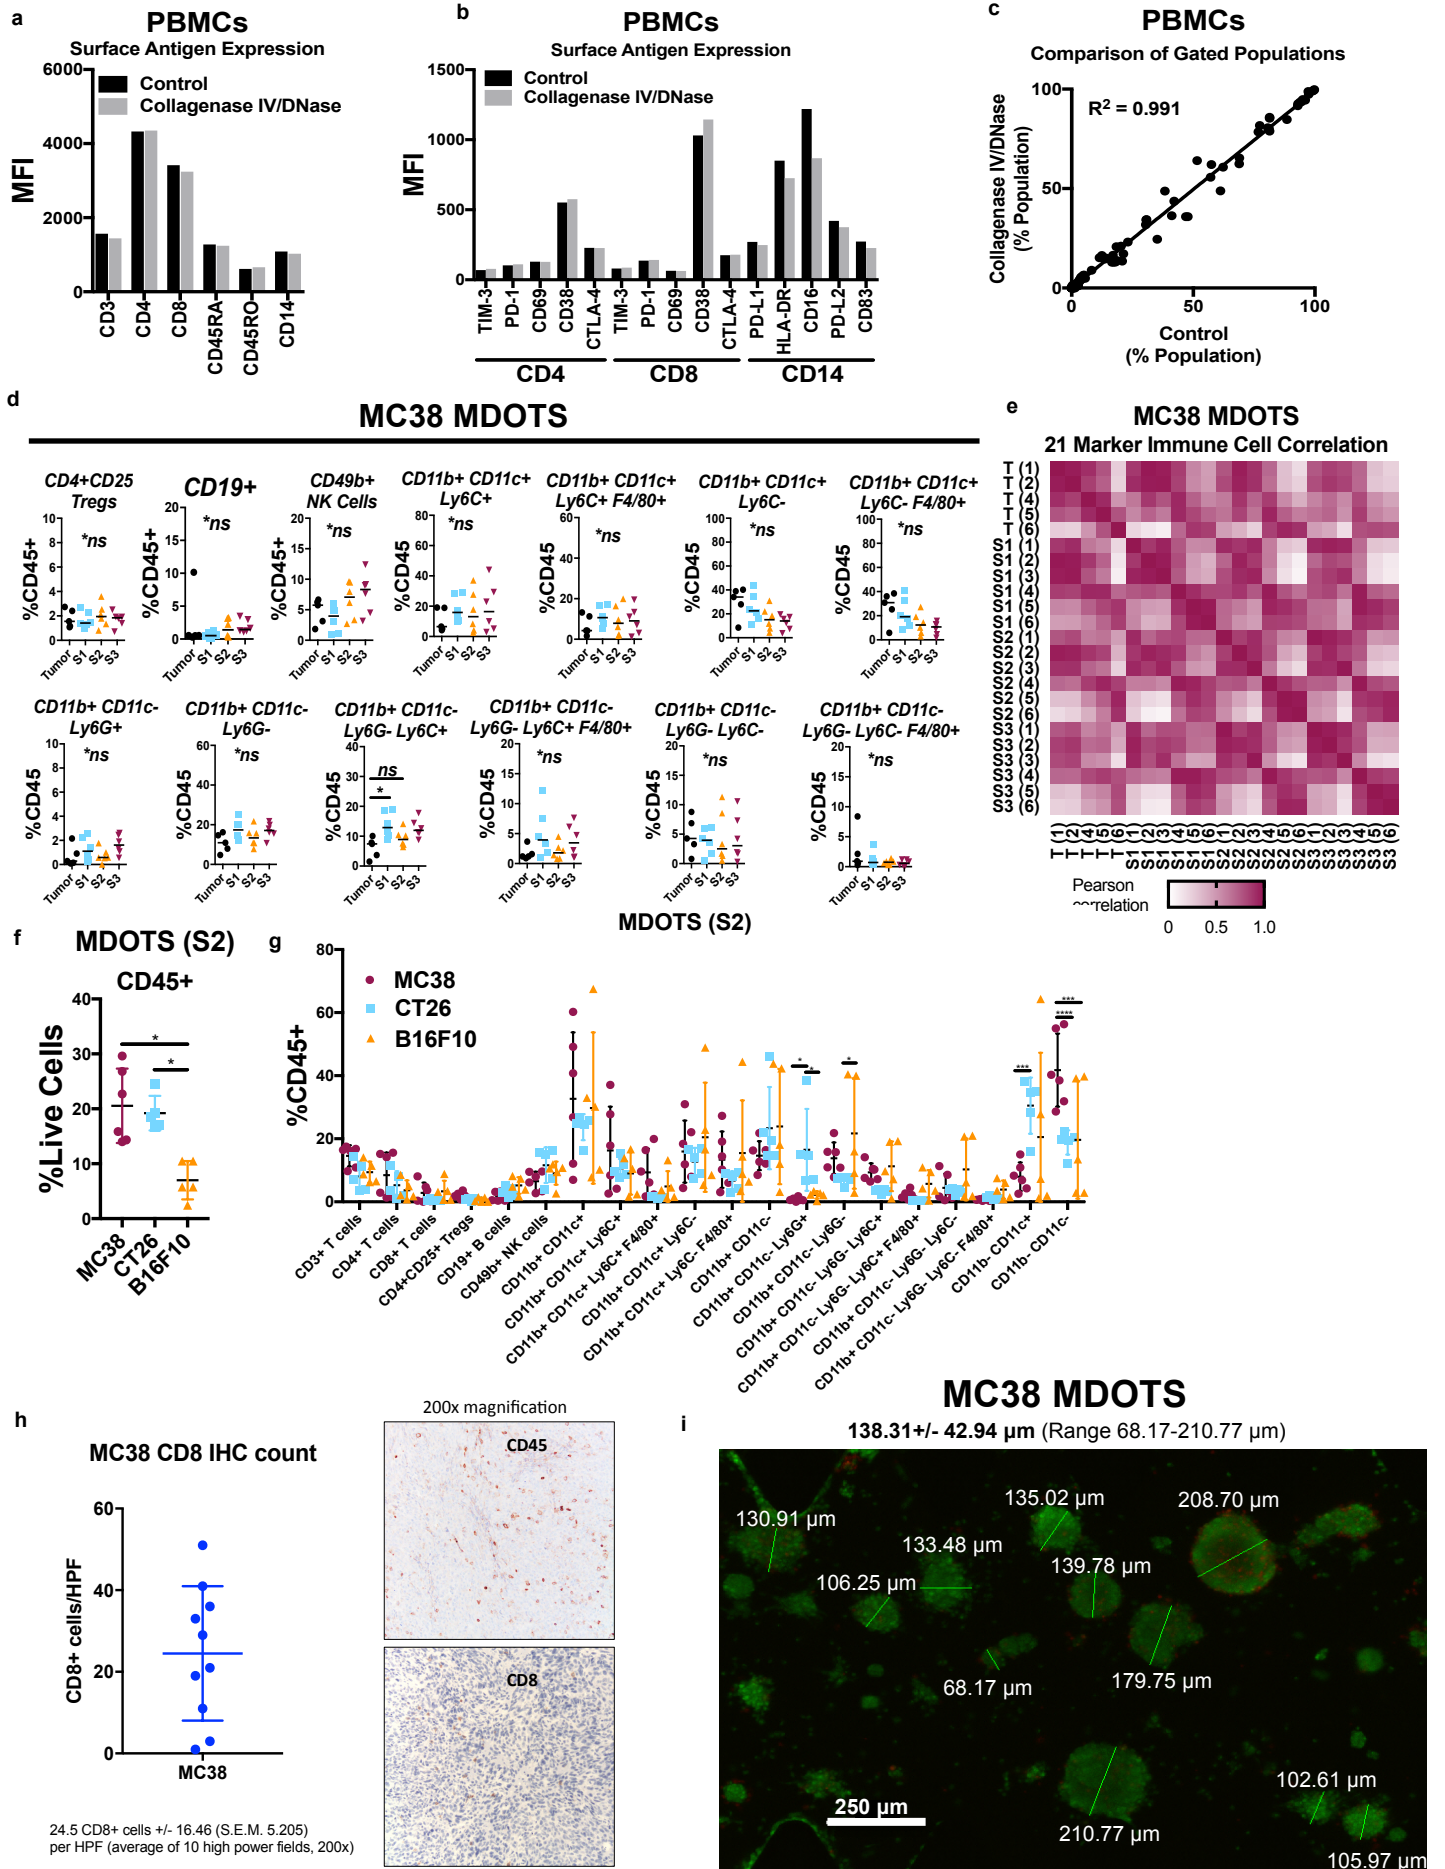

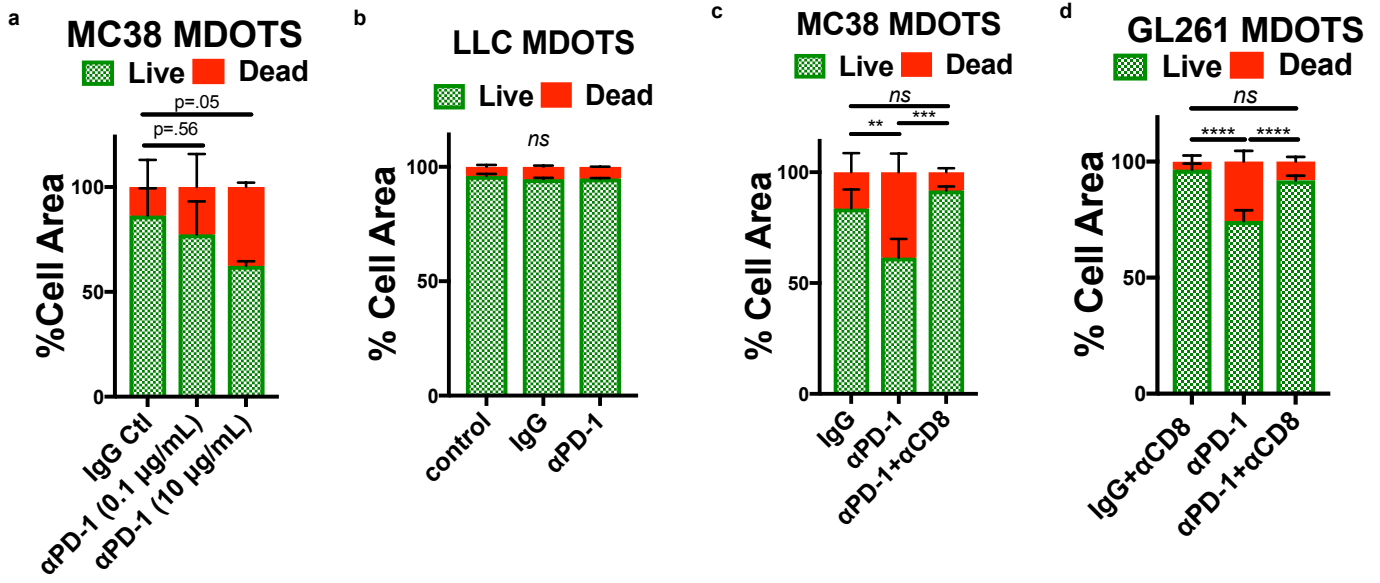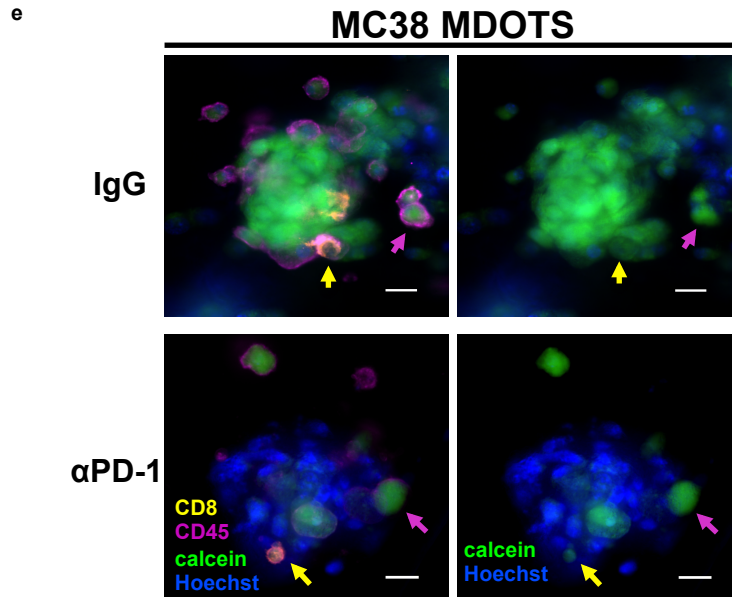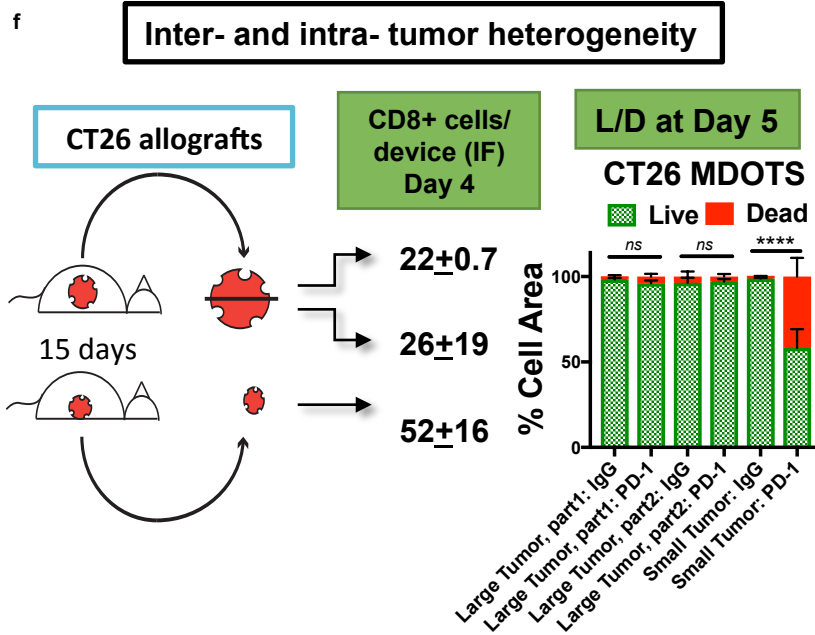



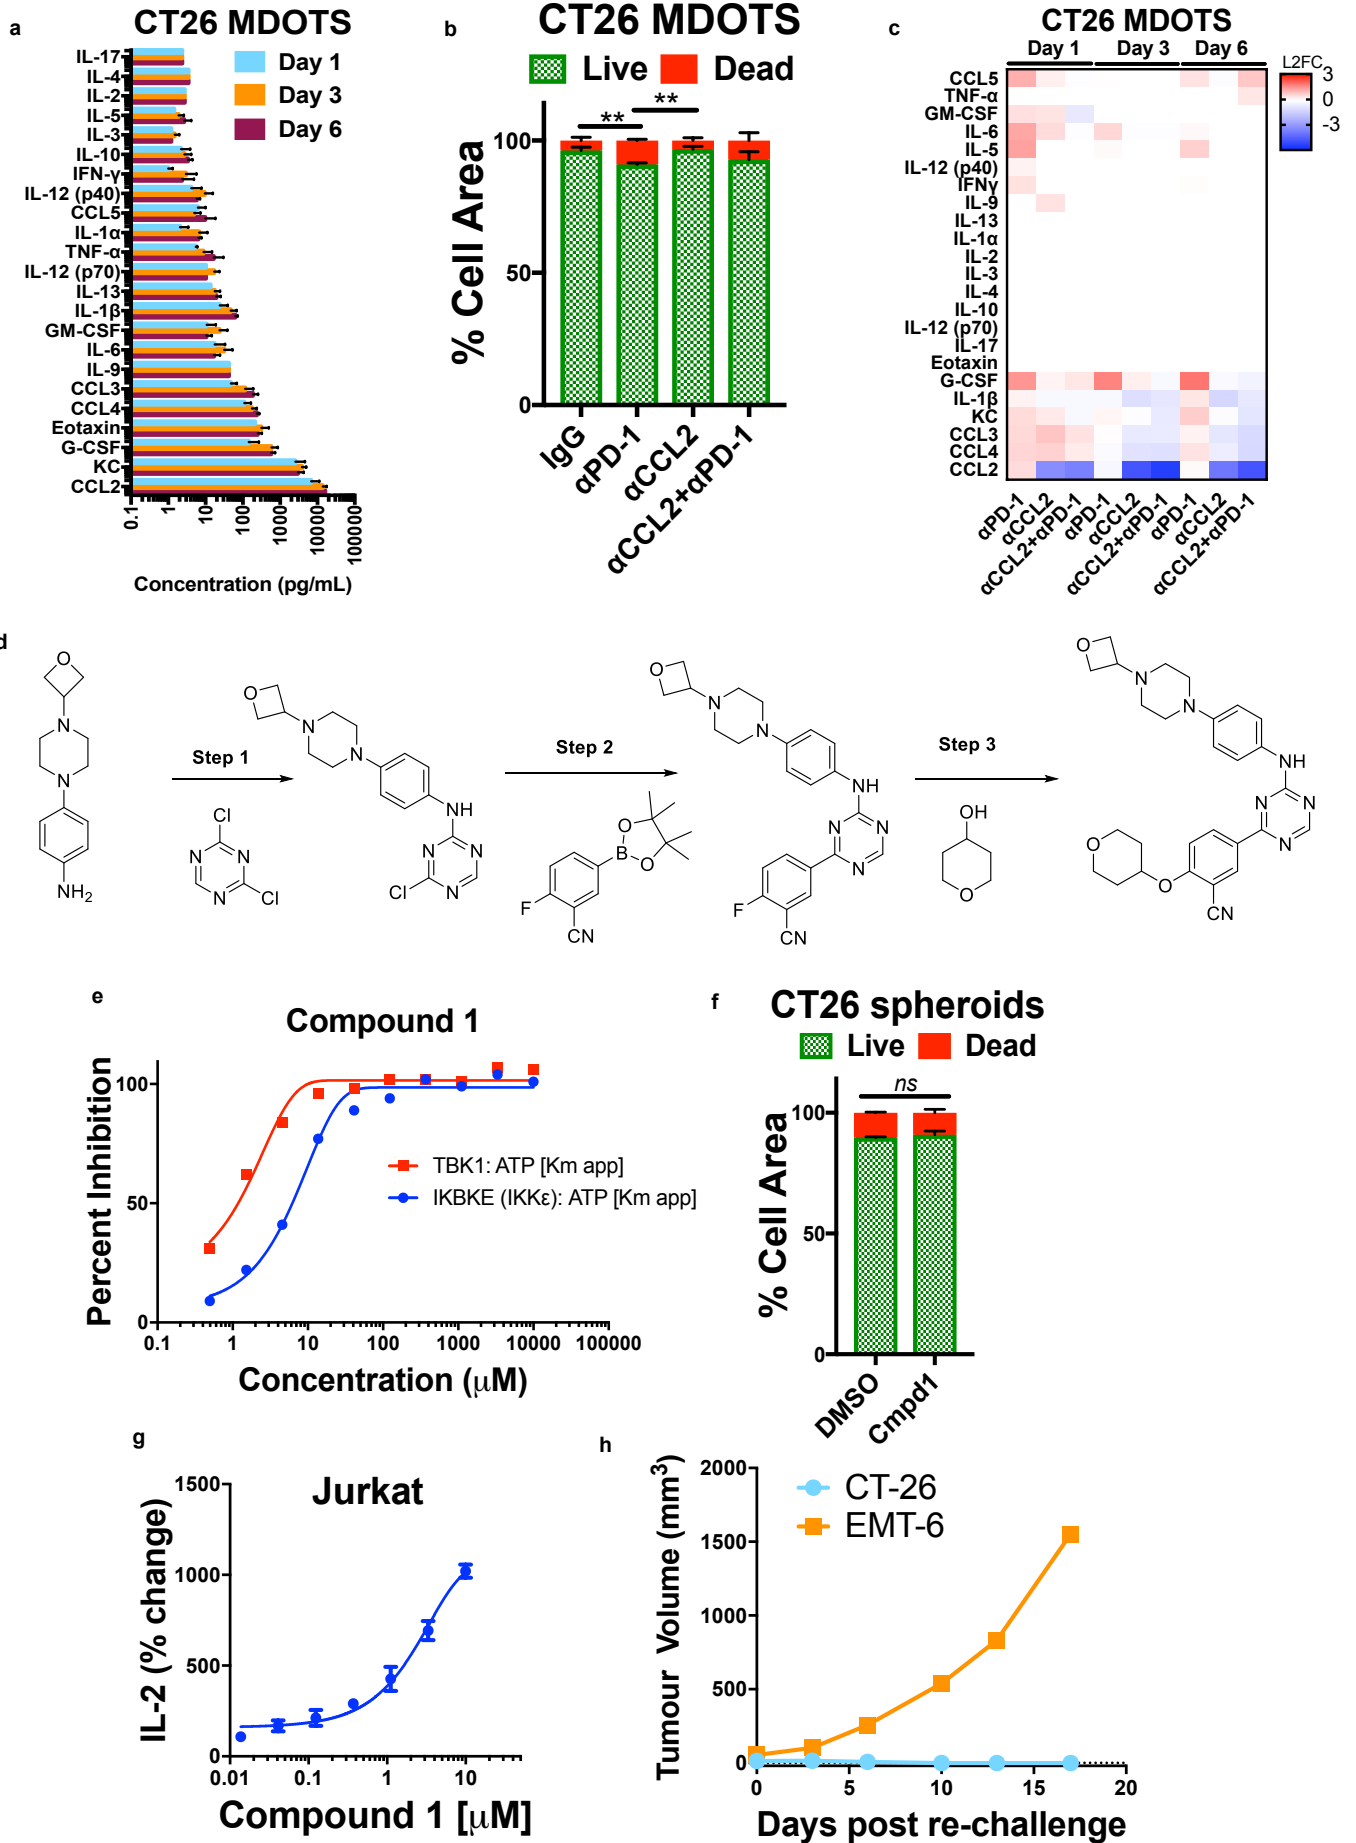

Supplementary Fig. 5

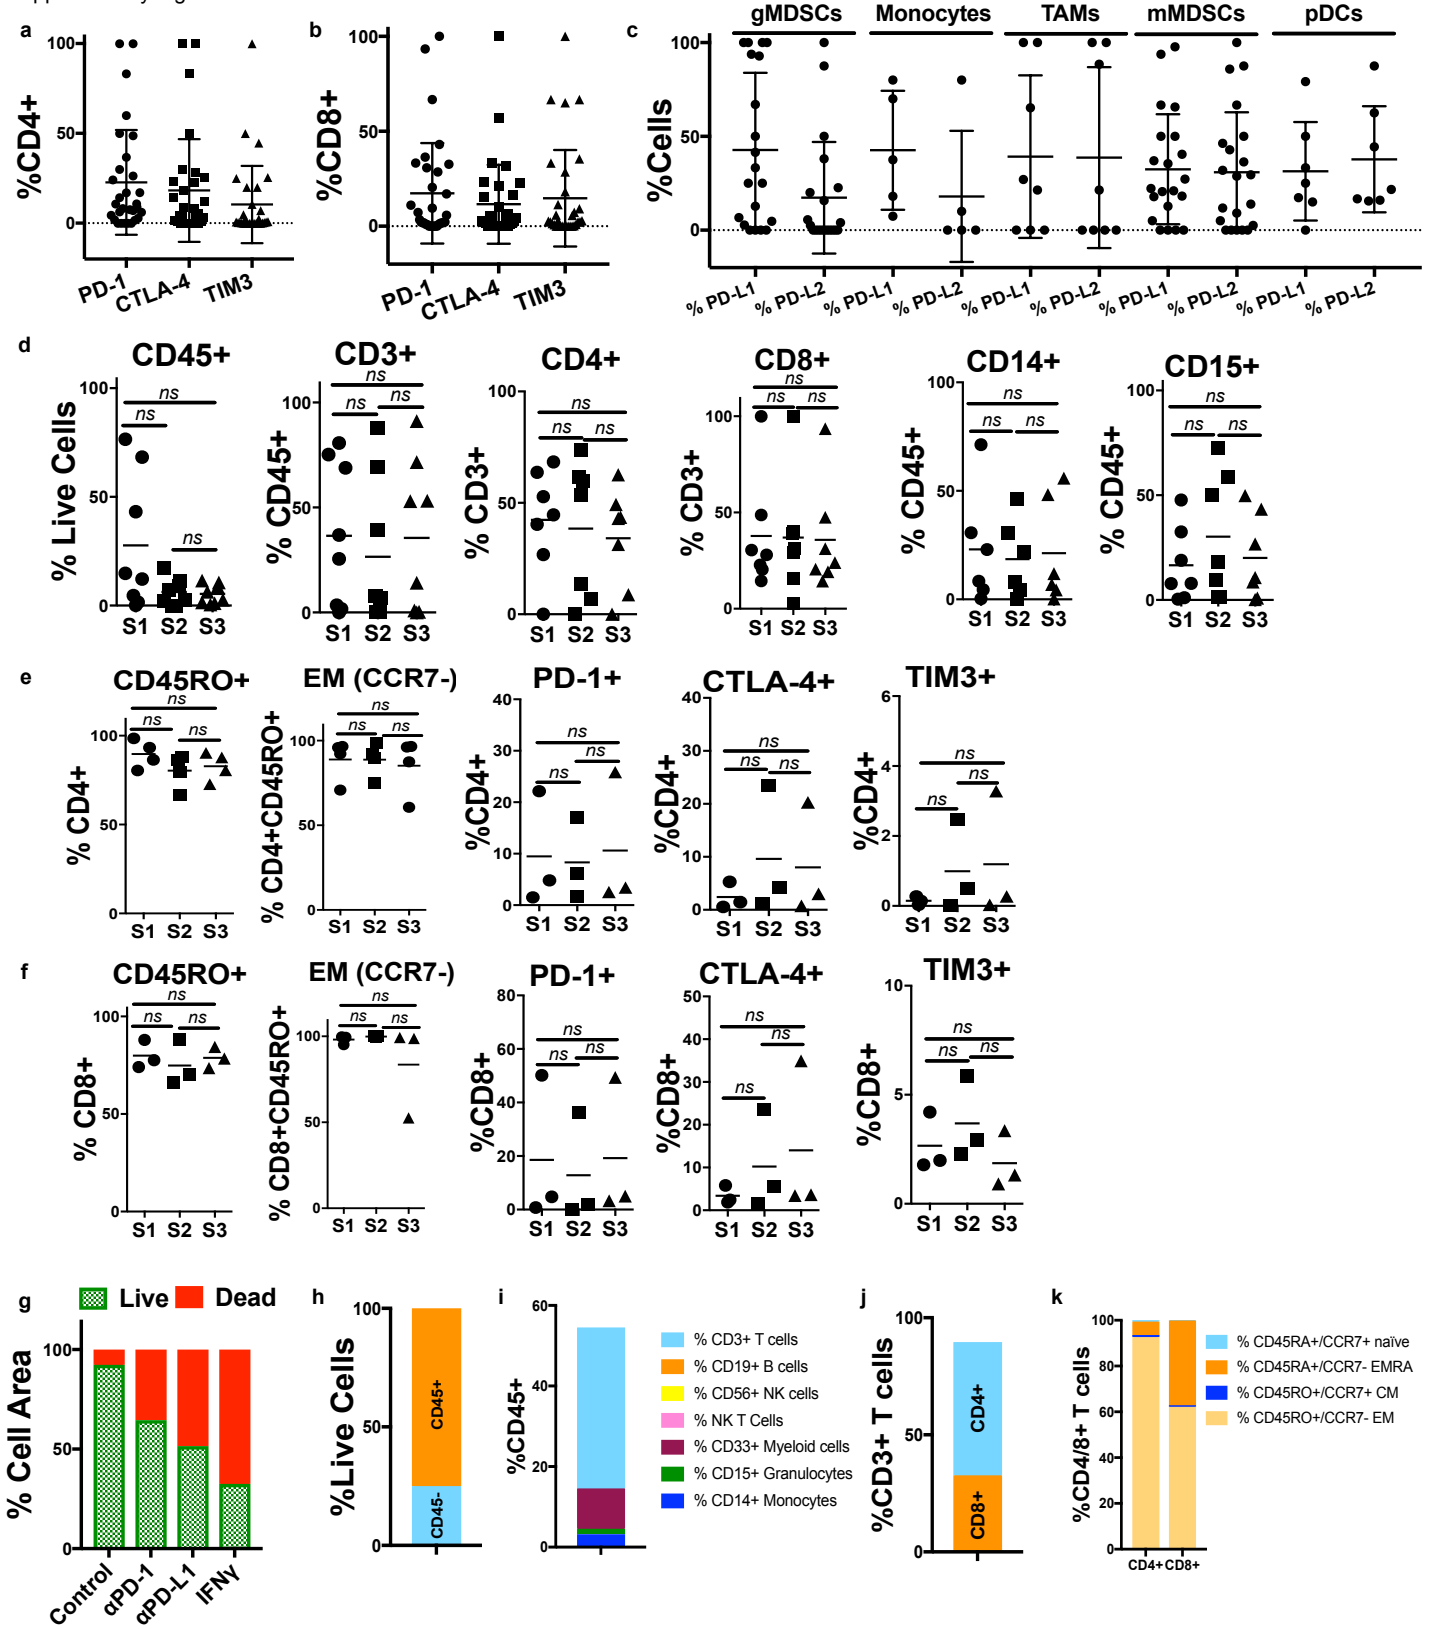

Supplementary Fig. 6

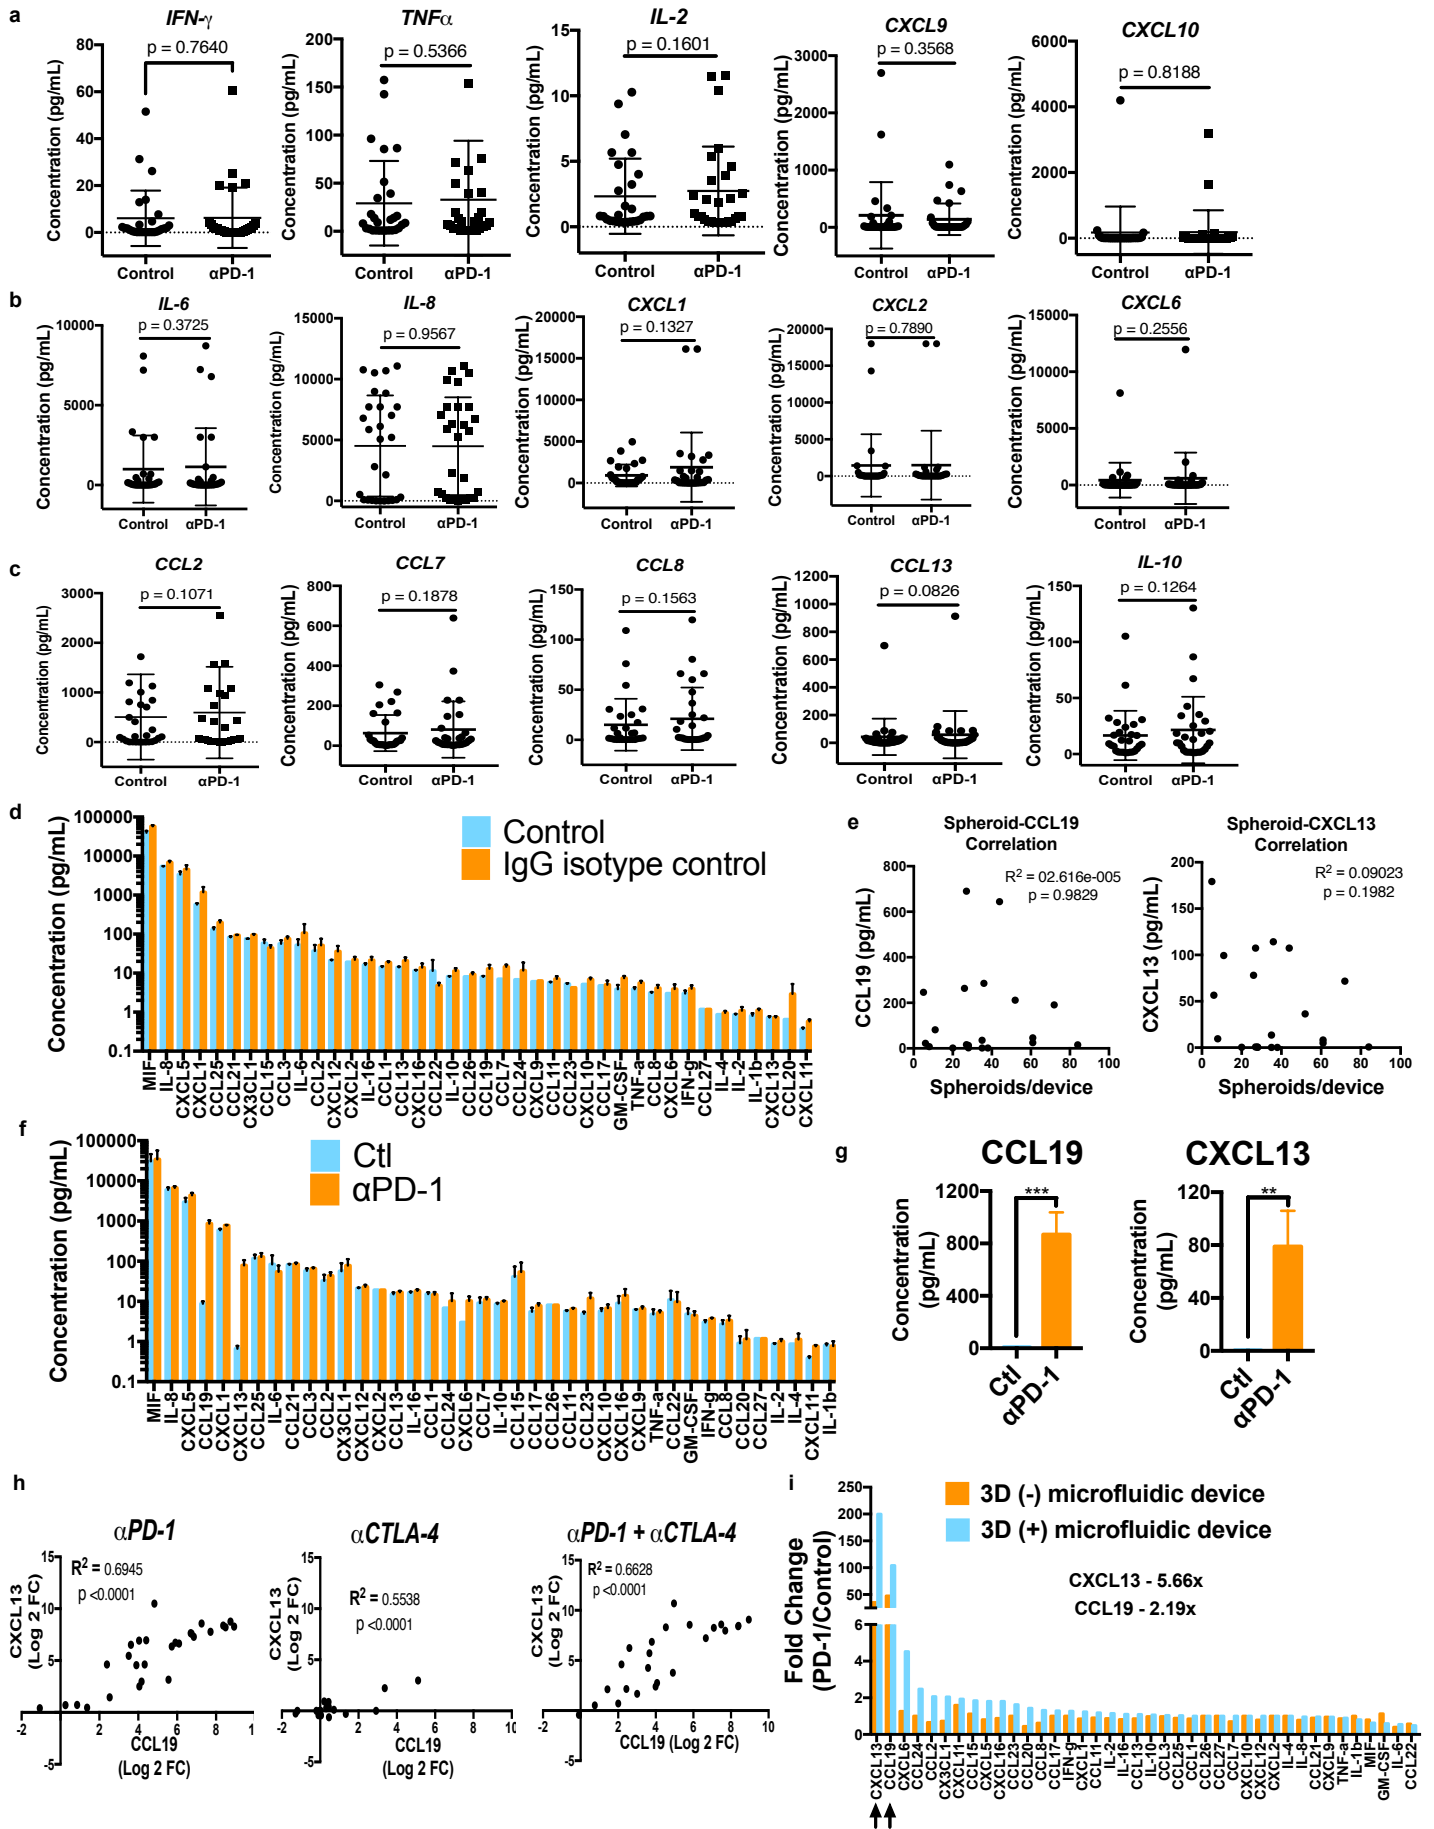

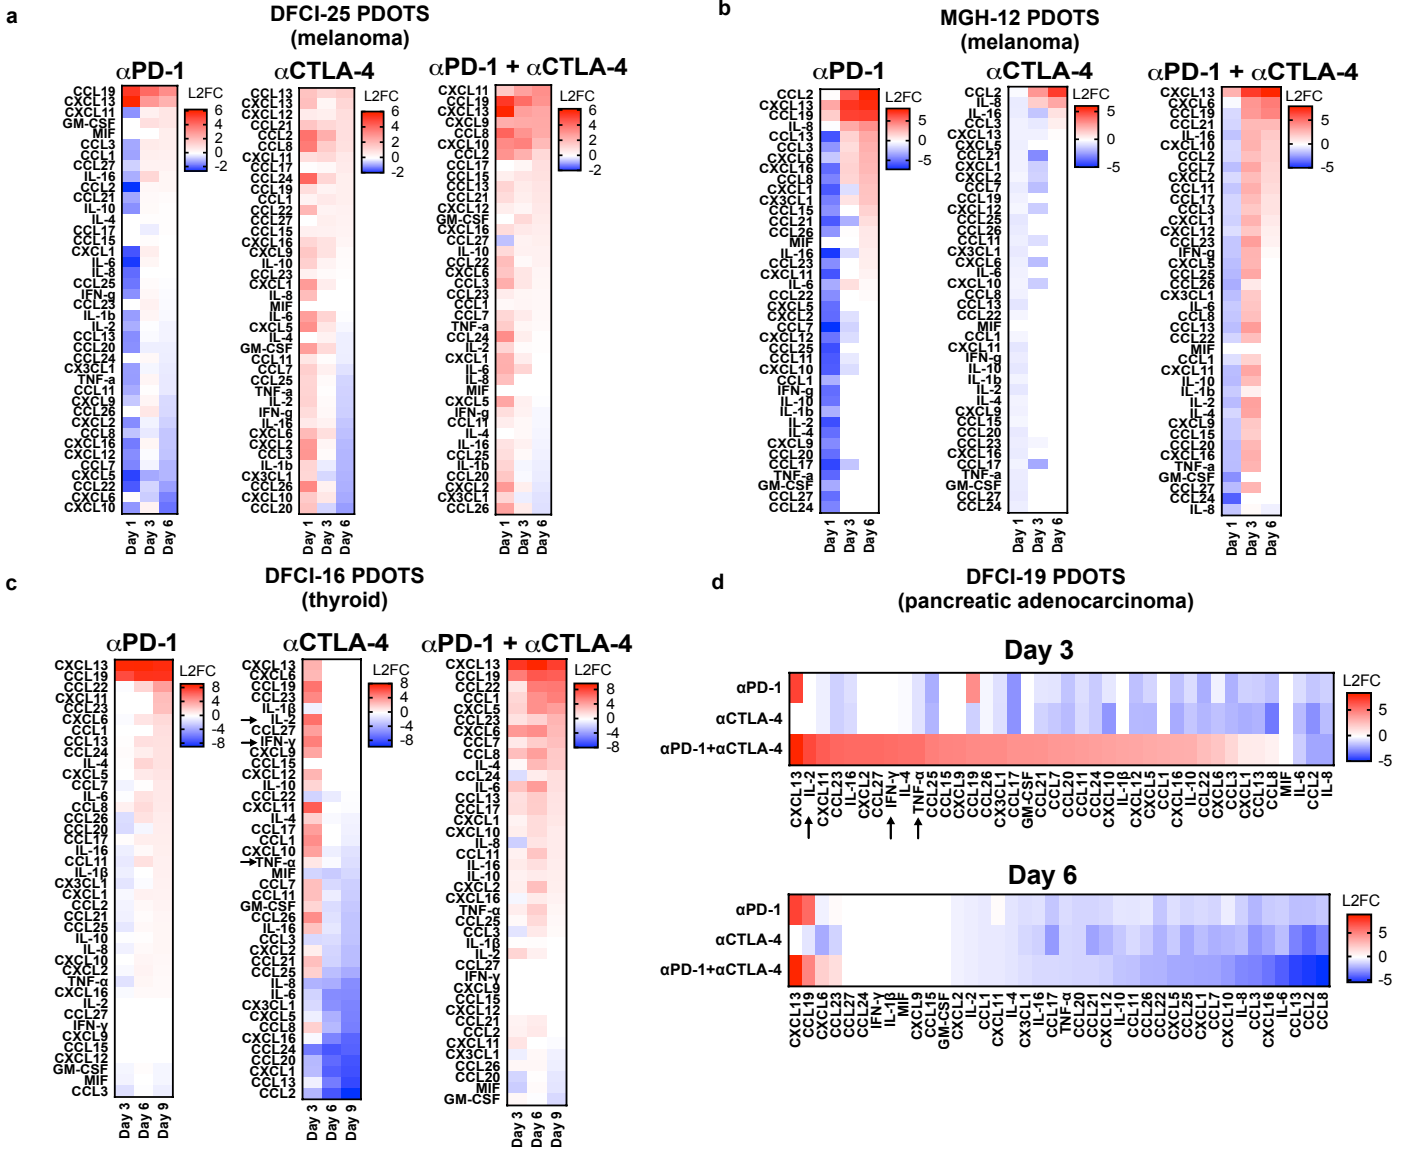

Supplementary Fig. 8

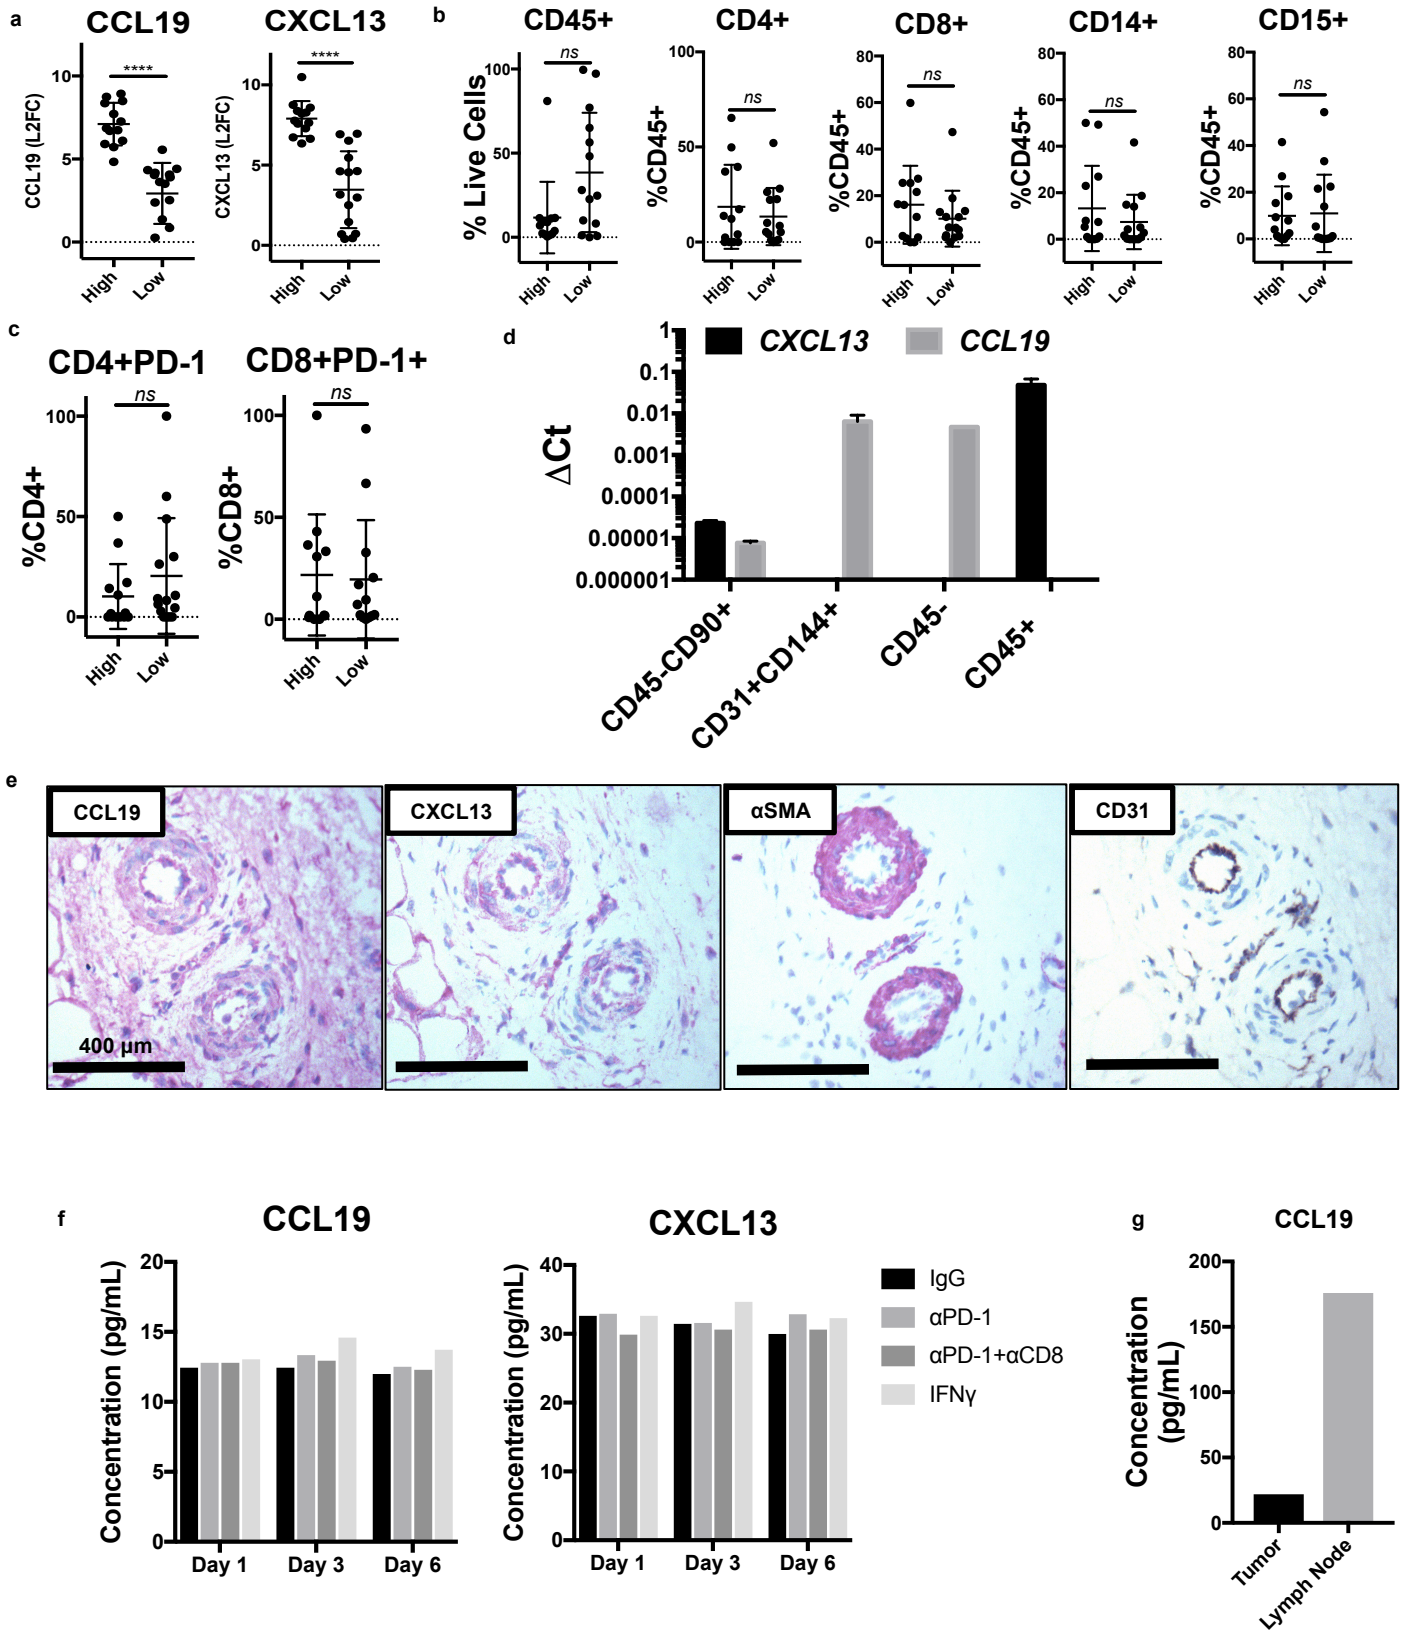

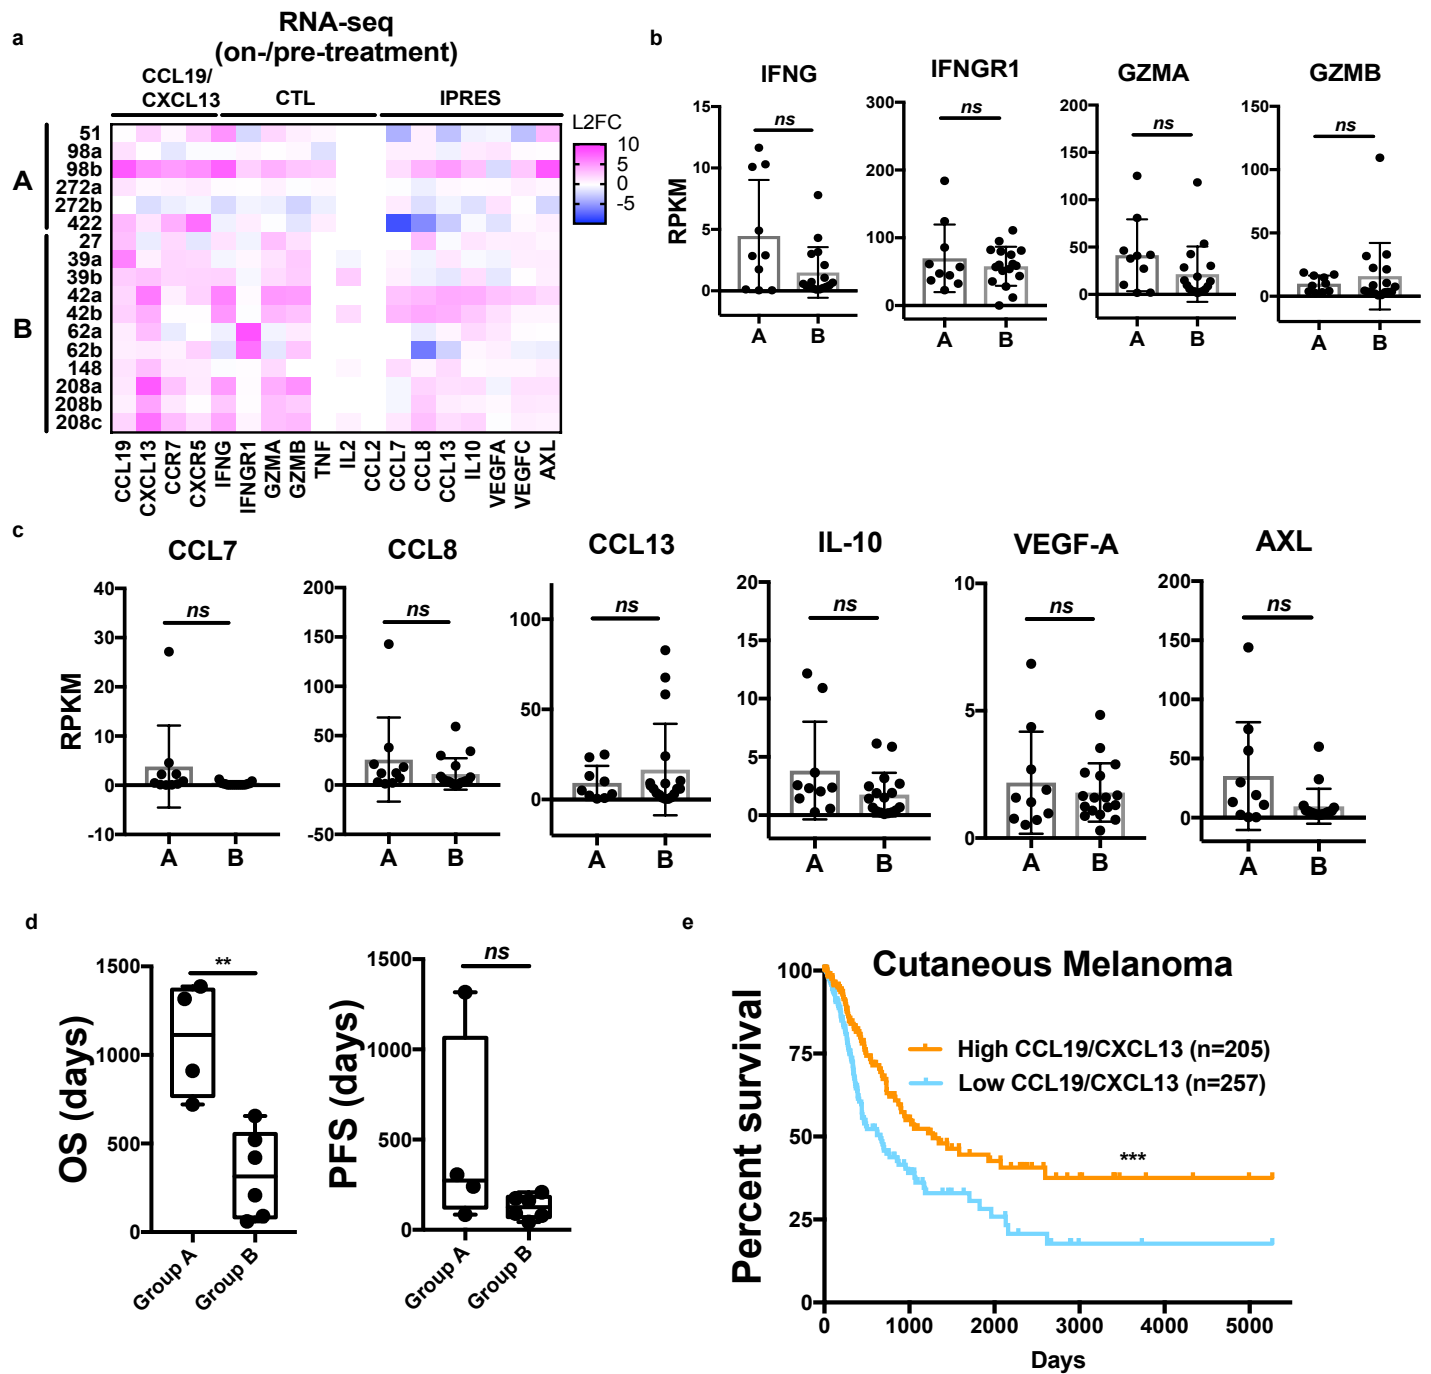

Supplementary Fig. 10

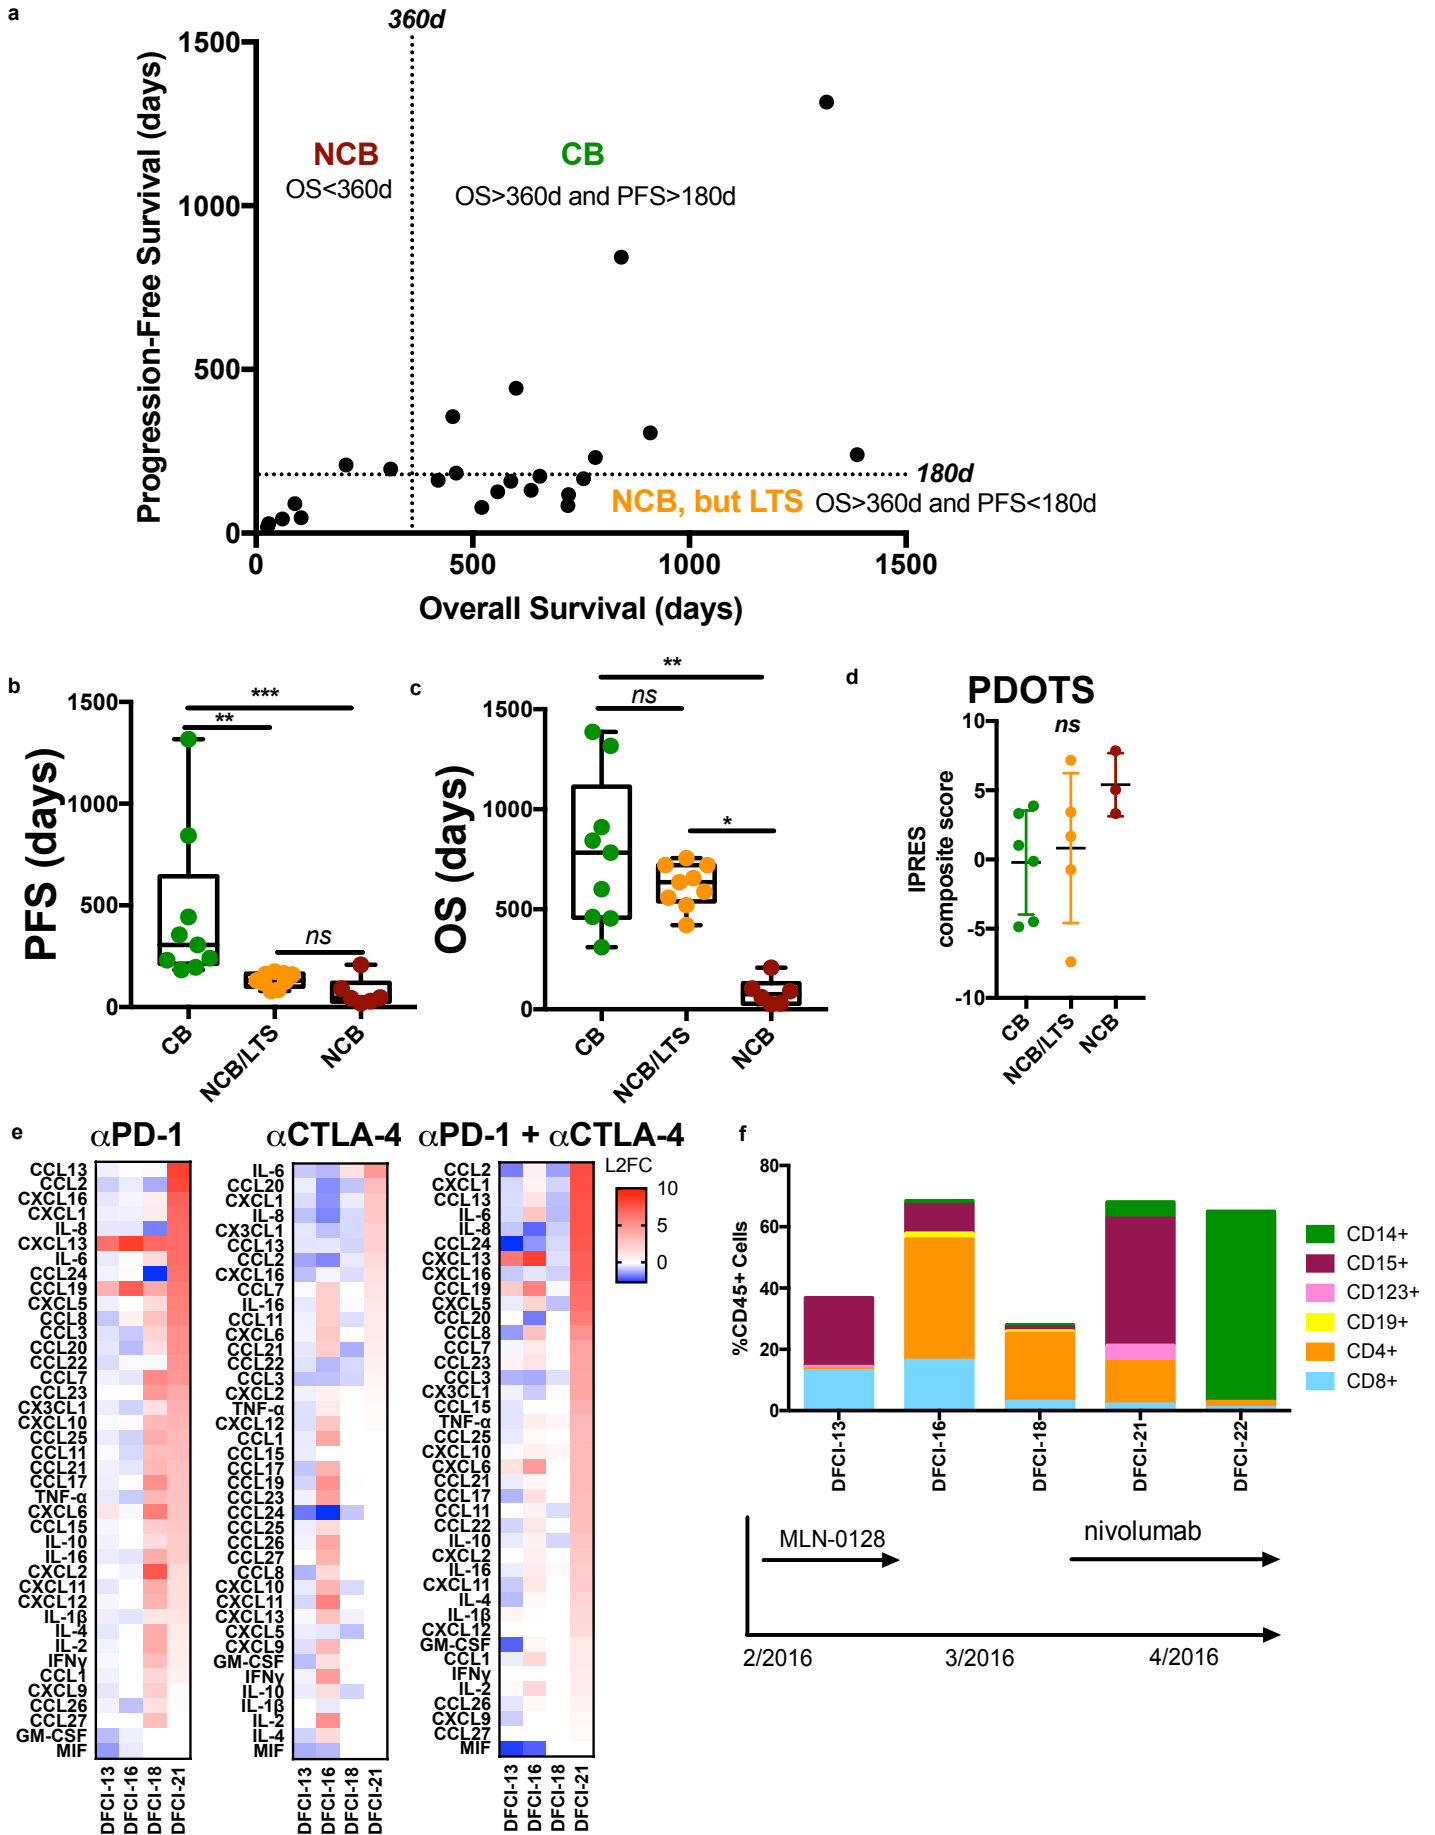

Supplement: NIHMS918503-supplement-1.pdf [file NIHMS918503-supplement-1.pdf]
